# Supplementary material
Source: PubMed Central journal article supplement (PMC5908480)
Supplement: NIHMS956448-supplement-SI.pdf [file NIHMS956448-supplement-SI.pdf]

## Supporting Information

### Spectroscopic and Reactivity Comparisons of a Pair of bTAML Complexes with Fe<sup>V</sup>=O and Fe<sup>IV</sup>=O Units

Santanu Pattanayak<sup>†</sup>, Andrew J. Jasniewski<sup>§</sup>, Atanu Rana<sup>‡</sup>, Apparao Draksharapu<sup>§</sup>, Kundan K. Singh<sup>†</sup>, Andrew Weitz<sup>¥</sup>, Michael Hendrich<sup>¥</sup>, Lawrence Que, Jr.<sup>§,\*</sup>, Abhishek Dey<sup>‡,\*</sup>, and Sayam Sen Gupta<sup>ψ,\*</sup>

<sup>†</sup>Chemical Engineering Division, CSIR-National Chemical Laboratory, Pune 411008, India

<sup>§</sup>Department of Chemistry and Center for Metals in Biocatalysis, University of Minnesota, Minneapolis Minnesota, United States

<sup>‡</sup>Department of Inorganic Chemistry, Indian Association for the Cultivation of Science, Kolkata, India 700032

<sup>¥</sup>Department of Chemistry, Carnegie Mellon University, 4400 Fifth Avenue, Pittsburgh, Pennsylvania 15213, United States

<sup>ψ</sup>Department of Chemical Sciences, Indian Institute of Science Education and Research – Kolkata, Mohanpur, West Bengal, India 741246

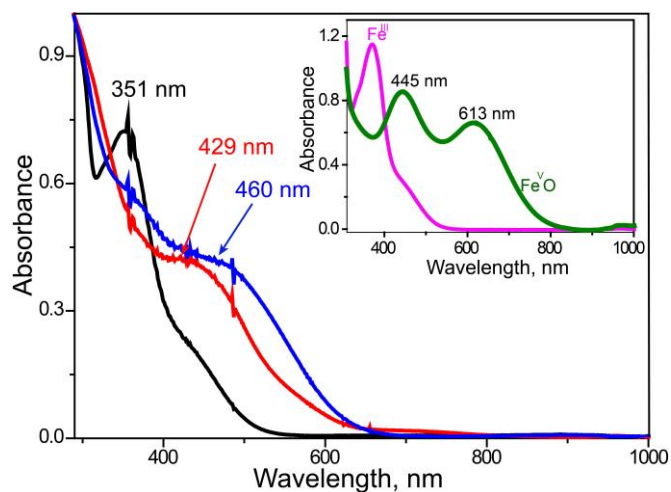

**Figure S1:** UV-vis absorption spectra of **2** ( $1.8 \times 10^{-4}$  M) synthesized in acetonitrile (red) and UV-vis and in pH 12 water (blue). Both samples were prepared via oxidation of **1** ( $1.8 \times 10^{-4}$  M; black). Please note: the red shift in UV-Vis spectrum for  $\text{Fe}^{\text{IV}}(\text{O})$  in the water/acetonitrile solvent mixture compared to MeCN may be due to the difference in solvent polarity in the two solvents or to possible coordination of the solvent to the available sixth site. For example,  $[\text{Fe}^{\text{IV}}(\text{O})\text{N}_4\text{Py}]$  exhibits an absorption maxima at 695 in MeCN (*J. Am. Chem. Soc.*, **2004**, 126,472–473) and at 670 nm in water (*Angew. Chem. Int. Ed.*, **2015**, 54, 4357). This example shows that solvent can affect the absorbance max even when there are no available coordination sites in the  $\text{Fe}(\text{IV})=\text{O}$  center. Inset: UV-vis absorption spectra of  $2.8 \times 10^{-4}$  M of **1** (pink) and **3** (green) in acetonitrile.

File' Notes' T B1 Area Field Scale  
AW\$RAWHB MH4558,Fe(III)biuret + NaOCl + 4.2 0 -1.941 0.45 1.0

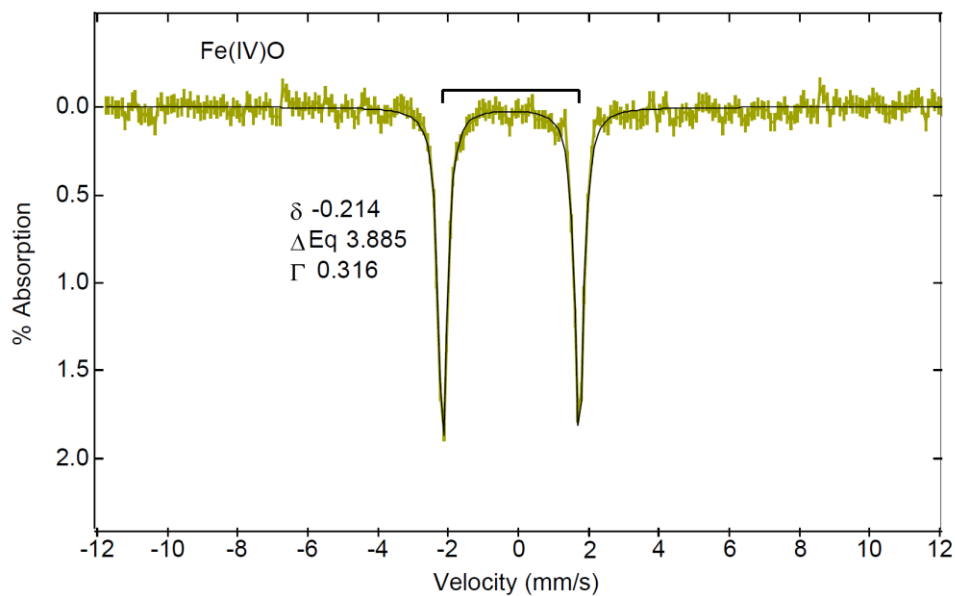

**Figure S2a.** Mossbauer spectra of  $[\text{Fe}^{\text{IV}}(\text{O})]^{2-}$  (**2**) synthesized in water (pH 12).

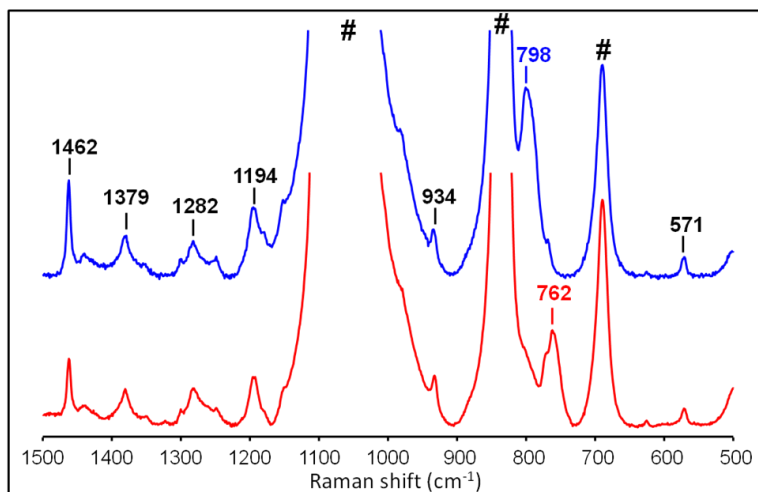

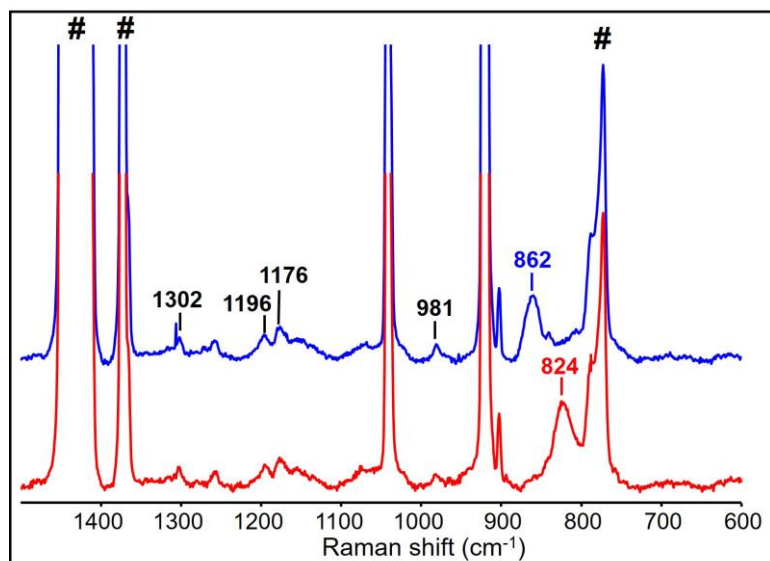

**Figure S2b.** Resonance Raman spectra of **2** (top) and **3** (bottom) at room temperature and 77 K, respectively. Blue and red lines represent  $^{16}\text{O}$ - and  $^{18}\text{O}$ -labelled samples, respectively. Conditions: **2**:  $\lambda_{\text{ex}} = 476.5$  nm, power  $\sim 40$  mW in  $\text{CH}_3\text{CN}$ ; **3**:  $\lambda_{\text{ex}} = 476.5$  nm, power  $\sim 40$  mW in  $\text{CD}_3\text{CN}$

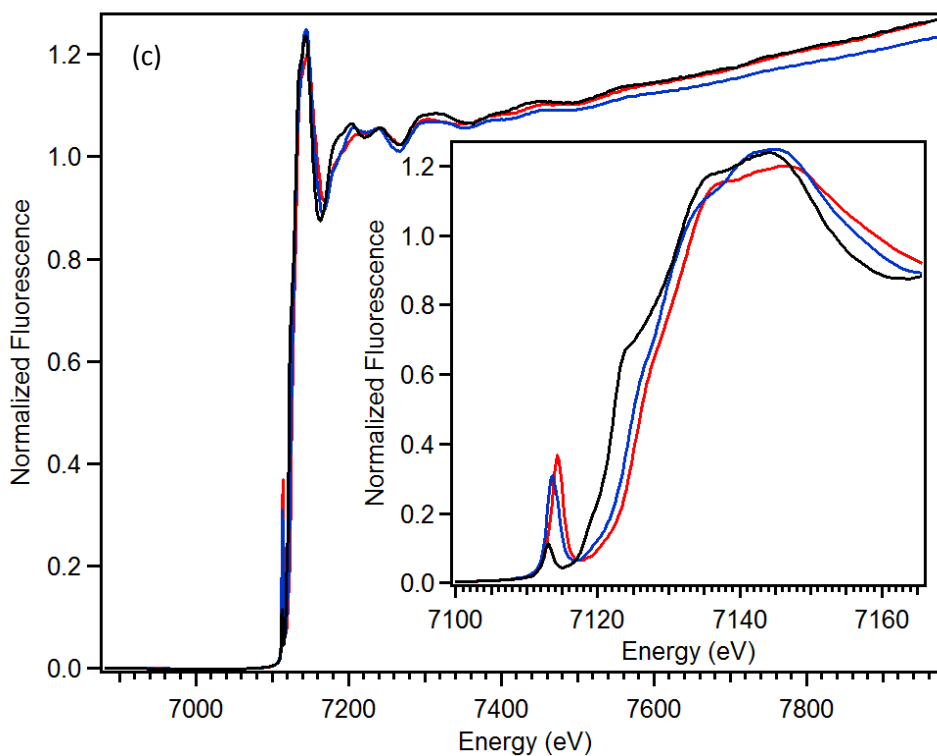

**Figure S2c.** Normalized Fe K-edge fluorescence spectra of **1** (black), **2** (blue) and **3** (red); inset – zoom in on the XANES region.

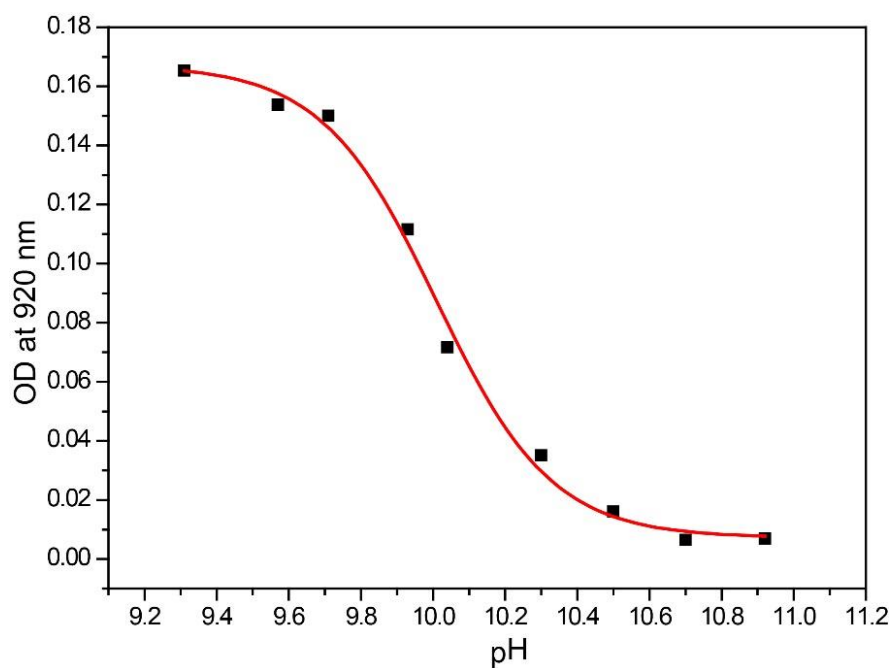

**Figure S3.**  $pK_a$  determination of **2** in water. The  $pK_a$  was determined by monitoring the increase in absorbance at 920 nm due to the formation of  $\mu\text{-O-Fe}^{\text{IV}}_2$  upon addition of acid. The following equilibrium takes place:

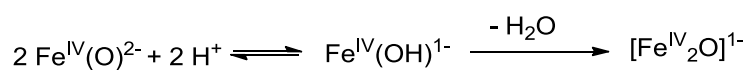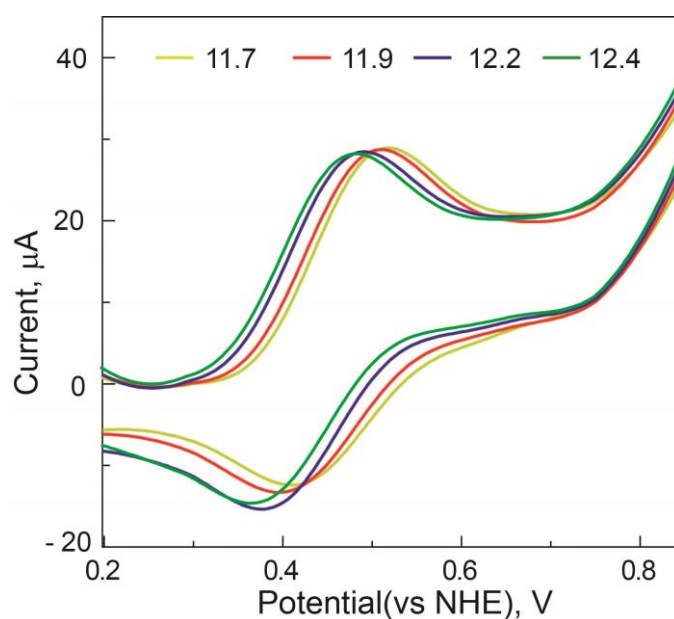

**Figure S4:** CVs of 2 mM of  $[(\text{bTAML})\text{Fe}^{\text{III}}(\text{Cl})]^{2-}$  (scan rate 100 mV/s, 0.1 M  $\text{KNO}_3$  as supporting electrolyte) in between pH 11.7 and 12.4. Scan window of 0.2 to 0.9 V.

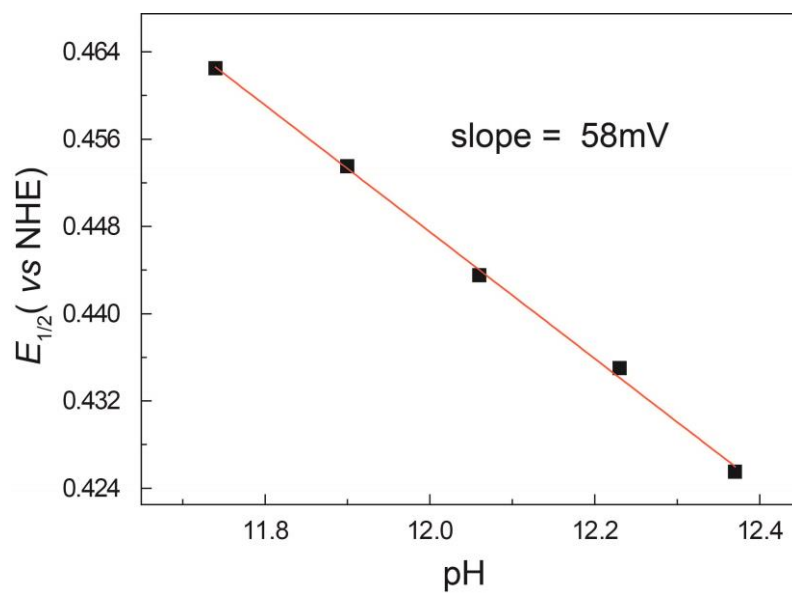

**Figure S5:** Plot of  $E_{1/2}$  vs pH for  $[(bTAML) Fe^{III}(Cl)]^{2-}$  (**1**) in water.

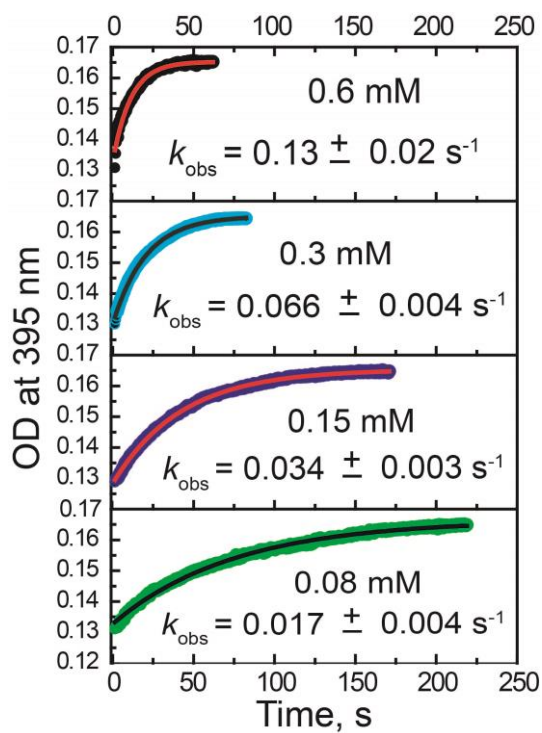

**Figure S6:** Kinetic traces for the reaction of **3** ( $5 \times 10^{-5}$  M) with benzyl alcohol at various concentrations of benzyl alcohol. The kinetic traces were fitted to the equation,  $[A_t = A_\alpha - (A_\alpha - A_o)e^{(-k_{\text{obs}} t)}]$  for obtaining  $k_{\text{obs}}$  values.

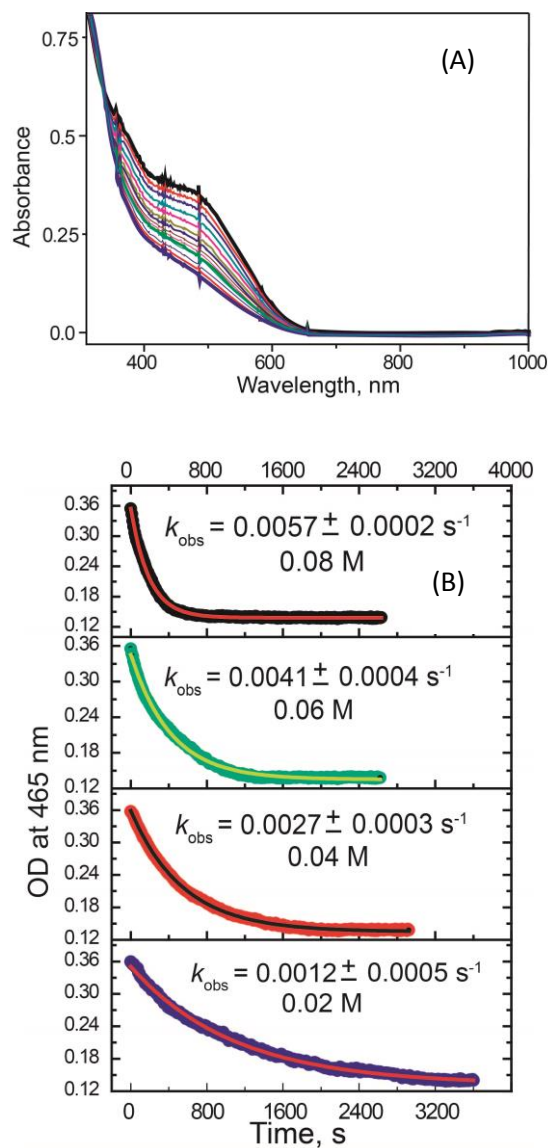

**Figure S7:** (A) Spectral scanning (B) Kinetic traces (The kinetic traces were fitted to the equation,  $[A_t = A_\alpha - (A_\alpha - A_o)e^{(-k_{\text{obs}} t)}]$  for obtaining  $k_{\text{obs}}$  values) for reaction with  $1.5 \times 10^{-4}$  M of **2** and benzyl alcohol.



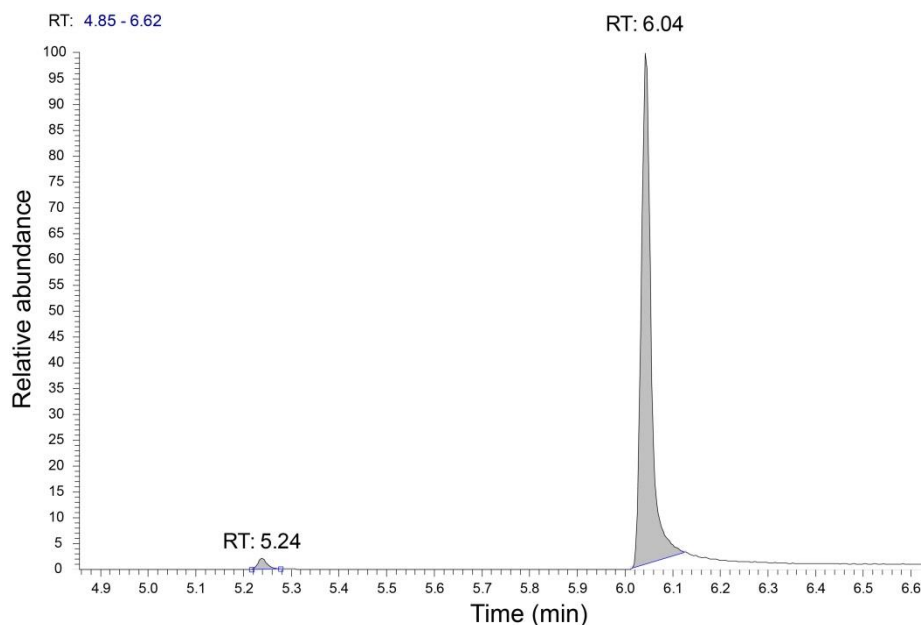

**Figure S8:** Gas chromatography traces for the reaction of benzyl alcohol with  $[\text{Fe}^{\text{IV}}(\text{O})]^{2-}$ . Chromatogram at 5.24 min and 6.04 min retention time correspond to benzaldehyde and benzyl alcohol respectively.

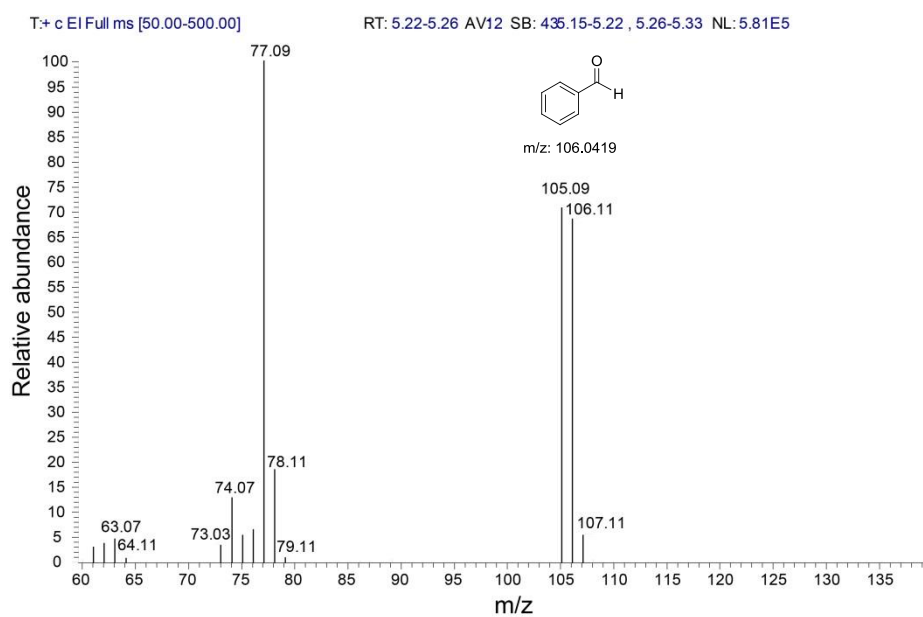

**Figure S9:** Mass spectra for benzaldehyde from the reaction of benzyl alcohol with  $[\text{Fe}^{\text{IV}}(\text{O})]^{2-}$  (106.1 molecular ion peak, 105.1 for  $\text{C}_6\text{H}_5\text{CO}^+$  and 77.09 for  $\text{C}_6\text{H}_5^+$ ).

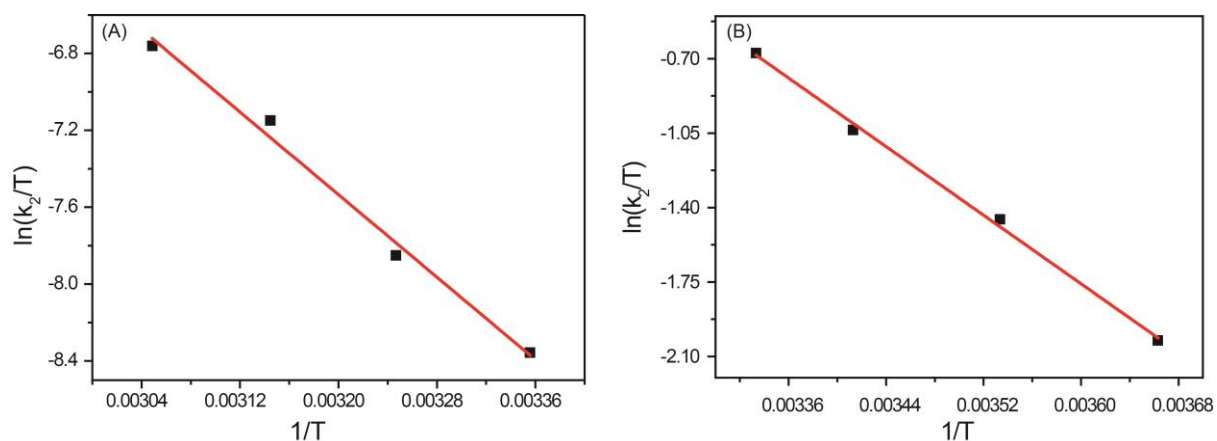

**Figure S10:** (A) Eyring plots for reaction of **2** with benzyl alcohol from 298 K to 328 K (B) Eyring plots for reaction of **3** with benzyl alcohol from 273 K to 300 K

**Table S1. XAS Pre-edge Peak Analysis of 1, 2 and 3**

| Species  | Peak Position (eV) | Area (units) | Relative Area |
|----------|--------------------|--------------|---------------|
| <b>1</b> | 7113.0             | 14.1         | 1.0           |
| <b>2</b> | 7113.5             | 36.7         | 2.4           |
|          | 7114.4             | 15.1         | 1.0           |
|          | <b>Total</b>       | 51.8         |               |
| <b>3</b> | 7114.3             | 65.3         | 4.4           |

**Table S2. Fit Parameters of unfiltered XAS data for 1 from  $k = 2 - 15 \text{ \AA}^{-1}$ . Fit 8 is the most reasonable fit.**

| Fit      | Fe-N     |             |                     | Fe-Cl    |             |                     | Fe•••C   |             |                     | GOF         |            |            |
|----------|----------|-------------|---------------------|----------|-------------|---------------------|----------|-------------|---------------------|-------------|------------|------------|
|          | N        | R(Å)        | $\sigma^2(10^{-3})$ | N        | R(Å)        | $\sigma^2(10^{-3})$ | N        | R(Å)        | $\sigma^2(10^{-3})$ | $E_0$       | F          | F'         |
| 1        | 6        | 1.86        | 3.17                |          |             |                     |          |             |                     | -1.36       | 1722       | 675        |
| 2        | 5        | 1.86        | 2.31                |          |             |                     |          |             |                     | -0.95       | 1579       | 647        |
| 3        | 4        | 1.87        | 1.43                |          |             |                     |          |             |                     | -0.10       | 1516       | 633        |
| 4        | 3        | 1.87        | 0.46                |          |             |                     |          |             |                     | 0.63        | 1566       | 644        |
| 5        | 4        | 1.87        | 1.45                | 1        | 2.38        | 3.54                |          |             |                     | -0.62       | 1224       | 569        |
| 6        | 4        | 1.87        | 1.34                | 1        | 2.37        | 3.10                | 6        | 2.83        | 1.00                | -0.03       | 761        | 449        |
| 7        | 4        | 1.87        | 1.26                | 1        | 2.37        | 3.00                | 6        | 2.83        | 1.21                | 0.11        | 620        | 405        |
|          |          |             |                     |          |             |                     | 4        | 3.99        | 0.00                |             |            |            |
| <b>8</b> | <b>4</b> | <b>1.87</b> | <b>1.29</b>         | <b>1</b> | <b>2.37</b> | <b>3.06</b>         | <b>6</b> | <b>2.83</b> | <b>1.15</b>         | <b>0.06</b> | <b>641</b> | <b>411</b> |
|          |          |             |                     |          |             |                     | <b>5</b> | <b>3.99</b> | <b>1.19</b>         |             |            |            |
| 9        | 4        | 1.87        | 1.32                | 1        | 2.37        | 3.07                | 6        | 2.83        | 1.02                | 1.69        | 673        | 422        |
|          |          |             |                     |          |             |                     | 6        | 3.83        | 1.44                |             |            |            |

Scale Factor  $S_0^2=0.9$ . GOF= Goodness-of-fit calculated as  $F = \sqrt{\sum k^6 (\chi_{\text{exp}} - \chi_{\text{calc}})^2}$

$$F' = \sqrt{\sum k^6 (\chi_{\text{exp}} - \chi_{\text{calc}})^2 / \sum k^6 \chi_{\text{exp}}^2}$$

Fit 8 gives the most reasonable fit of the experimental data

**Table S3. Fit Parameters of unfiltered XAS data for 2 from  $k = 2 - 15 \text{ \AA}^{-1}$**

| Fit      | Fe-N     |             |                     | Fe-O     |             |                     | Fe•••C   |             |                     | GOF         |            |            |
|----------|----------|-------------|---------------------|----------|-------------|---------------------|----------|-------------|---------------------|-------------|------------|------------|
|          | N        | R(Å)        | $\sigma^2(10^{-3})$ | N        | R(Å)        | $\sigma^2(10^{-3})$ | N        | R(Å)        | $\sigma^2(10^{-3})$ | $E_0$       | F          | F'         |
| 1        | 6        | 1.86        | 6.04                |          |             |                     |          |             |                     | 5.00        | 1051       | 702        |
| 2        | 5        | 1.86        | 4.48                |          |             |                     |          |             |                     | 5.38        | 903        | 650        |
| 3        | 4        | 1.87        | 3.15                |          |             |                     |          |             |                     | 6.70        | 795        | 610        |
| 4        | 3        | 1.87        | 1.87                |          |             |                     |          |             |                     | 8.01        | 768        | 599        |
| 5        | 4        | 1.87        | 3.06                |          |             |                     | 6        | 2.83        | 2.78                | 5.77        | 519        | 493        |
| 6        | 4        | 1.86        | 2.69                | 1        | 1.64        | 6.19                | 6        | 2.82        | 2.66                | 3.39        | 409        | 437        |
| <b>7</b> | <b>4</b> | <b>1.86</b> | <b>2.67</b>         | <b>1</b> | <b>1.64</b> | <b>5.95</b>         | <b>6</b> | <b>2.82</b> | <b>2.67</b>         | <b>3.22</b> | <b>345</b> | <b>402</b> |
|          |          |             |                     |          |             |                     | <b>5</b> | <b>4.01</b> | <b>5.14</b>         |             |            |            |

Scale Factor  $S_0^2=0.9$ . GOF= Goodness-of-fit calculated as  $F = \sqrt{\sum k^6 (\chi_{\text{exp}} - \chi_{\text{calc}})^2}$

$$F' = \sqrt{\sum k^6 (\chi_{\text{exp}} - \chi_{\text{calc}})^2 / \sum k^6 \chi_{\text{exp}}^2}$$

Fit 7 gives the most reasonable fit of the experimental data

**Table S4. Fit Parameters of unfiltered XAS data for 3 from  $k = 2 - 15 \text{ \AA}^{-1}$ .**

| Fit      | Fe-N     |                   |                     | Fe-O     |                   |                     | Fe•••C   |                   |                     | GOF          |            |            |
|----------|----------|-------------------|---------------------|----------|-------------------|---------------------|----------|-------------------|---------------------|--------------|------------|------------|
|          | N        | R( $\text{\AA}$ ) | $\sigma^2(10^{-3})$ | N        | R( $\text{\AA}$ ) | $\sigma^2(10^{-3})$ | N        | R( $\text{\AA}$ ) | $\sigma^2(10^{-3})$ | $E_0$        | F          | F'         |
| 1        | 6        | 1.87              | 4.85                |          |                   |                     |          |                   |                     | 0.31         | 1796       | 853        |
| 2        | 5        | 1.87              | 3.06                |          |                   |                     |          |                   |                     | 0.56         | 1457       | 769        |
| 3        | 4        | 1.87              | 1.82                |          |                   |                     |          |                   |                     | 1.61         | 1163       | 687        |
| 4        | 3        | 1.87              | 0.58                |          |                   |                     |          |                   |                     | 2.64         | 957        | 623        |
| 5        | 4        | 1.86              | 2.11                | 1        | 1.59              | 1.56                |          |                   |                     | -0.40        | 677        | 524        |
| 6        | 5        | 1.86              | 3.41                | 1        | 1.60              | 0.93                |          |                   |                     | -0.95        | 789        | 565        |
| <b>7</b> | <b>4</b> | <b>1.86</b>       | <b>2.19</b>         | <b>1</b> | <b>1.59</b>       | <b>1.34</b>         | <b>6</b> | <b>2.82</b>       | <b>2.18</b>         | <b>-1.63</b> | <b>295</b> | <b>346</b> |
| 8        | 4        | 1.86              | 2.17                | 1        | 1.59              | 1.33                | 5        | 2.82              | 1.42                | -1.52        | 291        | 343        |
| 9        | 4        | 1.86              | 2.15                | 1        | 1.59              | 1.32                | 4        | 2.83              | 0.66                | -1.25        | 298        | 347        |

Scale Factor  $S_0^2=0.9$ . GOF= Goodness-of-fit calculated as  $F = \sqrt{\sum k^6 (\chi_{\text{exp}} - \chi_{\text{calc}})^2}$

$$F' = \sqrt{\sum k^6 (\chi_{\text{exp}} - \chi_{\text{calc}})^2 / \sum k^6 \chi_{\text{exp}}^2}$$

Fit 7 gives the most reasonable fit of the experimental data

**Table S5a.** The relative energies of  $[\text{Fe}^{\text{V}}(\text{O})(\text{bTAML})]^-$  (**3**) in doublet and quartet electronic states in kcal/mol using UBP86 or UB3LYP functionals and the 6-311+G\* basis set in acetonitrile solvent.

|         | $\Delta E(\text{kCal})$ | $\Delta(E+\text{ZPE})(\text{kCal})$ | $\Delta G(\text{kCal})$ |
|---------|-------------------------|-------------------------------------|-------------------------|
|         | UBP86(UB3LYP)           | UBP86(UB3LYP)                       | UBP86(UB3LYP)           |
| $S=1/2$ | 0.0(0.0)                | 0.0(0.0)                            | 0.0(0.0)                |
| $S=3/2$ | 14.1(10.4)              | 13.1(9.3)                           | 11.7(7.3)               |

**Table S5b.** The relative energies of  $[\text{Fe}^{\text{IV}}(\text{O})(\text{bTAML})]^{2-}$  (**2**) in triplet and quintet electronic states in kcal/mol using UBP86 or UB3LYP functionals and the 6-311+G\* basis set in acetonitrile solvent.

|       | $\Delta E(\text{kCal})$ | $\Delta(E+\text{ZPE})(\text{kCal})$ | $\Delta G(\text{kCal})$ |
|-------|-------------------------|-------------------------------------|-------------------------|
|       | UBP86(UB3LYP)           | UBP86(UB3LYP)                       | UBP86(UB3LYP)           |
| $S=1$ | 0.0(0.0)                | 0.0(0.0)                            | 0.0(0.0)                |
| $S=2$ | 26.0(19.5)              | 24.8(18.2)                          | 23.0(16.5)              |

## XYZ Coordinates for the optimized geometries in Gas Phase

### Fe<sup>V</sup>(O)<sub>2</sub>(S = 1/2) (BP86)

|    |             |             |             |
|----|-------------|-------------|-------------|
| Fe | 0.03811100  | 0.07370500  | -0.00044800 |
| O  | -0.00935100 | -0.00176800 | 3.97117600  |
| O  | 4.04984600  | 0.14101500  | 0.71339300  |
| O  | 2.05855000  | 1.39252600  | -3.20596200 |
| O  | -3.00301000 | 1.60191000  | -2.14596600 |
| N  | -0.60797300 | 0.25567000  | 1.73388300  |
| N  | 1.73443500  | 0.27503400  | 0.81852100  |
| N  | 0.52352100  | 1.00968800  | -1.51227100 |
| N  | -1.71383900 | 0.67542400  | -0.43369100 |
| C  | -2.00427400 | 0.39776700  | 1.86927600  |
| C  | 0.29181600  | 0.08415900  | 2.77019800  |
| C  | 1.74867200  | -0.02902800 | 2.26994200  |
| C  | 2.93549900  | 0.33514400  | 0.17879400  |
| C  | 1.80937100  | 1.04831000  | -2.03084300 |
| C  | -0.59035200 | 1.30433700  | -2.46880400 |
| C  | -1.91930300 | 1.21409500  | -1.67371500 |
| C  | -2.64001000 | 0.63693600  | 0.61330300  |
| C  | -4.03227100 | 0.84630800  | 0.54990600  |
| H  | -4.48885900 | 1.04701800  | -0.42110600 |
| C  | -4.78108300 | 0.80126100  | 1.73717900  |
| H  | -5.86658200 | 0.95453100  | 1.69304000  |
| C  | -4.15585900 | 0.55930000  | 2.97402500  |
| H  | -4.75429800 | 0.52053000  | 3.89257600  |
| C  | -2.76671400 | 0.36231500  | 3.05402600  |
| H  | -2.26060500 | 0.18046300  | 4.00311500  |
| C  | 2.58453300  | 0.97989400  | 3.09214700  |
| H  | 3.65467300  | 0.84979300  | 2.87869200  |
| H  | 2.37766600  | 0.81643400  | 4.16381400  |
| H  | 2.29251500  | 2.01433400  | 2.83531400  |
| C  | 2.20810500  | -1.48619300 | 2.53034800  |
| H  | 3.26981400  | -1.58561000 | 2.25509100  |

|   |             |             |             |
|---|-------------|-------------|-------------|
| H | 1.60877500  | -2.17744800 | 1.91203600  |
| H | 2.06505800  | -1.73894800 | 3.59585000  |
| C | 4.19357300  | 0.73047500  | -1.90188300 |
| H | 4.39732300  | 1.75359200  | -2.26242800 |
| H | 4.18777300  | 0.06031700  | -2.77788800 |
| H | 4.95235000  | 0.41985800  | -1.17227700 |
| C | -0.66557000 | 0.23227000  | -3.58373400 |
| H | 0.21240600  | 0.30882700  | -4.24335500 |
| H | -1.59218200 | 0.38239100  | -4.16555200 |
| H | -0.69260600 | -0.77329100 | -3.12717500 |
| C | -0.51046800 | 2.73346500  | -3.04834600 |
| H | 0.32368400  | 2.81621800  | -3.75850900 |
| H | -0.36177800 | 3.46512900  | -2.23368700 |
| H | -1.47174100 | 2.95797700  | -3.54174200 |
| O | -0.01536700 | -1.47477800 | -0.37488700 |
| N | 2.89705800  | 0.67660300  | -1.21375900 |

**Fe<sup>V</sup>(O) (S = 3/2) (BP86)**

|    |             |             |             |
|----|-------------|-------------|-------------|
| Fe | 0.09085700  | 0.23822200  | 0.02084100  |
| O  | -0.01233600 | -0.06292300 | 4.02006300  |
| O  | 4.04445900  | 0.22336700  | 0.71805600  |
| O  | 2.10163000  | 1.30066800  | -3.28059700 |
| O  | -3.00606000 | 1.63046800  | -2.11710800 |
| N  | -0.63169800 | 0.14389600  | 1.77430100  |
| N  | 1.73939500  | 0.41573400  | 0.88070100  |
| N  | 0.53720400  | 1.09421400  | -1.57521500 |
| N  | -1.69151200 | 0.74268400  | -0.39789500 |
| C  | -2.01441600 | 0.32786100  | 1.89547200  |
| C  | 0.26971700  | 0.02346700  | 2.81340600  |
| C  | 1.74738300  | 0.03229800  | 2.32024100  |
| C  | 2.92365300  | 0.37892500  | 0.18687400  |
| C  | 1.80170000  | 1.00158900  | -2.10480900 |
| C  | -0.60324800 | 1.35065500  | -2.49804000 |
| C  | -1.91313400 | 1.25570000  | -1.66108200 |



|   |             |             |             |
|---|-------------|-------------|-------------|
| C | -2.62530600 | 0.67373900  | 0.64298900  |
| C | -4.01439600 | 0.91359500  | 0.57556600  |
| H | -4.45339900 | 1.19003000  | -0.38468900 |
| C | -4.78199300 | 0.79986900  | 1.74428800  |
| H | -5.86265200 | 0.98240900  | 1.69597500  |
| C | -4.18219700 | 0.45995900  | 2.97413000  |
| H | -4.79841700 | 0.37916700  | 3.87814800  |
| C | -2.80164900 | 0.22654100  | 3.06236400  |
| H | -2.31296800 | -0.02280600 | 4.00590100  |
| C | 2.52280200  | 1.05171900  | 3.18102100  |
| H | 3.59431700  | 1.00634600  | 2.93644000  |
| H | 2.35636900  | 0.81964600  | 4.24689900  |
| H | 2.15402300  | 2.07477400  | 2.98546600  |
| C | 2.28786800  | -1.40787500 | 2.51454200  |
| H | 3.35851800  | -1.44159500 | 2.26115200  |
| H | 1.73743000  | -2.09571100 | 1.84886000  |
| H | 2.13712800  | -1.71904500 | 3.56311200  |
| C | 4.16349300  | 0.52431900  | -1.91624900 |
| H | 4.55655800  | 1.53602600  | -2.12916500 |
| H | 4.03806500  | 0.00325300  | -2.87700200 |
| H | 4.85907700  | -0.00302000 | -1.25163100 |
| C | -0.69573000 | 0.25653600  | -3.59285900 |
| H | 0.17376200  | 0.32771400  | -4.26424100 |
| H | -1.62951200 | 0.38815100  | -4.16719400 |
| H | -0.70133200 | -0.73793800 | -3.11318100 |
| C | -0.53415900 | 2.76438500  | -3.11203100 |
| H | 0.32860600  | 2.83046000  | -3.79141600 |
| H | -0.42162000 | 3.52154900  | -2.31526700 |
| H | -1.47382000 | 2.96634400  | -3.65412400 |
| O | 0.28503700  | -1.30854000 | -0.50167400 |
| N | 2.86353600  | 0.59112700  | -1.23372300 |

**Fe<sup>IV</sup>(O)<sub>2</sub>(S = 1) (BP86)**

|    |             |             |             |
|----|-------------|-------------|-------------|
| Fe | 0.06225900  | 0.24826400  | 0.03785000  |
| O  | 0.03211900  | -0.04473700 | 4.05282400  |
| O  | 4.07726200  | 0.24381200  | 0.72601700  |
| O  | 2.13182600  | 1.35498400  | -3.28427600 |
| O  | -3.00162700 | 1.65514300  | -2.16221700 |
| N  | -0.62073700 | 0.23291400  | 1.81486900  |
| N  | 1.75686200  | 0.41587800  | 0.86182000  |
| N  | 0.55974200  | 1.09142700  | -1.57411100 |
| N  | -1.69711500 | 0.83510800  | -0.39004000 |
| C  | -2.00812800 | 0.40035800  | 1.91687000  |
| C  | 0.27502300  | 0.05982500  | 2.82588000  |
| C  | 1.74605900  | -0.03043400 | 2.28385500  |
| C  | 2.94588700  | 0.45534400  | 0.20696600  |
| C  | 1.81697900  | 1.09250400  | -2.09109400 |
| C  | -0.58955500 | 1.28700100  | -2.50022800 |
| C  | -1.91332900 | 1.28686300  | -1.65715700 |
| C  | -2.62259700 | 0.74397600  | 0.65785400  |
| C  | -4.01350300 | 0.97345000  | 0.59913800  |
| H  | -4.44597900 | 1.24684000  | -0.36692000 |
| C  | -4.79195000 | 0.85880400  | 1.76796000  |
| H  | -5.87629900 | 1.03489700  | 1.71396800  |
| C  | -4.19297900 | 0.52369900  | 2.99556100  |
| H  | -4.80816500 | 0.43719500  | 3.90320500  |
| C  | -2.80459200 | 0.29725100  | 3.07695600  |
| H  | -2.30737100 | 0.05040000  | 4.01871000  |
| C  | 2.62355700  | 0.84902200  | 3.20166100  |
| H  | 3.68759600  | 0.70099400  | 2.96478400  |
| H  | 2.40418900  | 0.59031700  | 4.25320700  |
| H  | 2.37382800  | 1.91627300  | 3.04929100  |
| C  | 2.15150500  | -1.52395500 | 2.37425200  |
| H  | 3.21165600  | -1.63568400 | 2.08965400  |
| H  | 1.51975000  | -2.08977200 | 1.66610900  |
| H  | 1.99075900  | -1.90197100 | 3.40178900  |

|   |             |             |             |
|---|-------------|-------------|-------------|
| C | 4.21284000  | 0.87069700  | -1.85861500 |
| H | 4.38552500  | 1.87566500  | -2.28807900 |
| H | 4.26916300  | 0.14929700  | -2.69501000 |
| H | 4.96432900  | 0.63799900  | -1.09096800 |
| C | -0.68981700 | 0.08944700  | -3.47994300 |
| H | 0.18125300  | 0.09784900  | -4.15730300 |
| H | -1.62798200 | 0.14812600  | -4.06408100 |
| H | -0.68049900 | -0.84033600 | -2.88308900 |
| C | -0.52805000 | 2.63019600  | -3.25977400 |
| H | 0.31456700  | 2.62168400  | -3.96736900 |
| H | -0.37898500 | 3.46054600  | -2.54363900 |
| H | -1.49069900 | 2.79008700  | -3.77806500 |
| O | -0.00255300 | -1.34302100 | -0.36381700 |
| N | 2.90901100  | 0.80372800  | -1.19763900 |

**Fe<sup>IV</sup>(O)<sub>2</sub>(S = 2) (BP86)**

|    |             |             |             |
|----|-------------|-------------|-------------|
| Fe | 0.06761200  | -0.17136700 | -0.09604900 |
| O  | -0.01010600 | -0.01384000 | 3.99242200  |
| O  | 4.07696300  | 0.36610600  | 0.70509300  |
| O  | 2.15972400  | 1.21949100  | -3.33985600 |
| O  | -2.92475100 | 1.86103900  | -2.07461400 |
| N  | -0.64032900 | -0.17941100 | 1.74091700  |
| N  | 1.74255700  | 0.23434900  | 0.80571100  |
| N  | 0.57761800  | 0.83119800  | -1.67050900 |
| N  | -1.63101200 | 1.01900400  | -0.30144800 |
| C  | -2.01537300 | 0.10906500  | 1.85079400  |
| C  | 0.25111400  | -0.05329600 | 2.76673900  |
| C  | 1.73619200  | 0.07012800  | 2.27872000  |
| C  | 2.93553000  | 0.36825000  | 0.16650300  |
| C  | 1.83424500  | 0.87594400  | -2.17100800 |
| C  | -0.56827000 | 1.31823700  | -2.47952900 |
| C  | -1.85563300 | 1.43061900  | -1.56843700 |
| C  | -2.56704800 | 0.77400400  | 0.69051400  |
| C  | -3.94089800 | 1.11496600  | 0.68483900  |

|   |             |             |             |
|---|-------------|-------------|-------------|
| H | -4.33524000 | 1.60490400  | -0.20999300 |
| C | -4.74464200 | 0.83128000  | 1.80406900  |
| H | -5.81024300 | 1.10548200  | 1.78715000  |
| C | -4.19766600 | 0.21051700  | 2.94145200  |
| H | -4.82910500 | 0.00439800  | 3.81787400  |
| C | -2.83543300 | -0.15143200 | 2.96468100  |
| H | -2.38107200 | -0.61446300 | 3.84451800  |
| C | 2.34314100  | 1.29874700  | 2.99796600  |
| H | 3.41498300  | 1.37355800  | 2.75500000  |
| H | 2.18740100  | 1.20092500  | 4.08671200  |
| H | 1.83418700  | 2.21801100  | 2.65452400  |
| C | 2.47167100  | -1.22444200 | 2.71089800  |
| H | 3.53949200  | -1.14816900 | 2.44889000  |
| H | 2.03358300  | -2.09345600 | 2.18554500  |
| H | 2.34646300  | -1.37353200 | 3.79962400  |
| C | 4.23693500  | 0.46045000  | -1.87710100 |
| H | 4.82063300  | 1.37466000  | -1.64458100 |
| H | 4.09423200  | 0.39455300  | -2.96484300 |
| H | 4.80769300  | -0.39837900 | -1.48560900 |
| C | -0.89324100 | 0.30024500  | -3.59904900 |
| H | -0.05373000 | 0.26417700  | -4.31550200 |
| H | -1.82685800 | 0.58864200  | -4.11611700 |
| H | -1.02348900 | -0.69041600 | -3.12781100 |
| C | -0.32216000 | 2.73105800  | -3.05832100 |
| H | 0.47340100  | 2.70564800  | -3.81850300 |
| H | -0.01513500 | 3.42046500  | -2.24910400 |
| H | -1.27287600 | 3.09701500  | -3.48552300 |
| O | -0.68612100 | -1.50223900 | -0.74887500 |
| N | 2.90609200  | 0.48526200  | -1.27115700 |

**Fe<sup>V</sup>(O)<sub>2</sub>(S = 1/2) (B3LYP)**

|    |             |             |             |
|----|-------------|-------------|-------------|
| Fe | 0.02380000  | -0.06578700 | -0.01563400 |
| O  | 0.00800400  | 0.20511000  | 3.92521500  |
| O  | 4.03573500  | -0.07048900 | 0.71407700  |
| O  | 2.04556000  | 1.40262200  | -3.15583400 |
| O  | -2.99619700 | 1.42523400  | -2.17741000 |
| N  | -0.59046600 | 0.25387100  | 1.70106200  |
| N  | 1.75635900  | 0.09501000  | 0.79222400  |
| N  | 0.51459600  | 0.79470500  | -1.58748900 |
| N  | -1.70931900 | 0.57586400  | -0.45930300 |
| C  | -1.98578100 | 0.38511100  | 1.83712800  |
| C  | 0.30633100  | 0.16996900  | 2.74087000  |
| C  | 1.75555100  | 0.01106900  | 2.26834800  |
| C  | 2.94234700  | 0.03833200  | 0.14872300  |
| C  | 2.92900000  | 0.05821800  | -1.39853000 |
| C  | 1.79252300  | 0.83948900  | -2.09294100 |
| C  | -0.59805600 | 1.26445400  | -2.46667700 |
| C  | -1.92061000 | 1.08334300  | -1.69903700 |
| C  | -2.62737900 | 0.55781700  | 0.58837300  |
| C  | -4.01295700 | 0.73275000  | 0.52434800  |
| H  | -4.48046000 | 0.88030100  | -0.43841100 |
| C  | -4.74996500 | 0.72188900  | 1.70728800  |
| H  | -5.82802700 | 0.84974200  | 1.66330700  |
| C  | -4.11872000 | 0.54690800  | 2.93871700  |
| H  | -4.70479200 | 0.53703800  | 3.85337500  |
| C  | -2.73586300 | 0.38289800  | 3.01747600  |
| H  | -2.23513900 | 0.25743600  | 3.96514400  |
| C  | 2.56203200  | 1.15277100  | 2.92025900  |
| H  | 3.62083600  | 1.03618800  | 2.70414600  |
| H  | 2.39245100  | 1.14196300  | 3.99880300  |
| H  | 2.22933000  | 2.11882000  | 2.52922500  |
| C  | 2.24600300  | -1.36727200 | 2.76063200  |
| H  | 3.29722700  | -1.49266300 | 2.50689500  |
| H  | 1.66982400  | -2.16351500 | 2.28187700  |

|   |             |             |             |
|---|-------------|-------------|-------------|
| H | 2.11321400  | -1.44359900 | 3.84223000  |
| C | 4.27228600  | 0.63020000  | -1.88522600 |
| H | 4.38065000  | 1.67997300  | -1.60166500 |
| H | 4.33480300  | 0.57072400  | -2.97104000 |
| H | 5.08997700  | 0.07503700  | -1.42935300 |
| C | 2.82063900  | -1.41718100 | -1.87426100 |
| H | 1.89648500  | -1.88825500 | -1.53955300 |
| H | 3.66307900  | -1.98573600 | -1.47184600 |
| H | 2.86348600  | -1.46118700 | -2.96630600 |
| C | -0.68717000 | 0.43042000  | -3.75750300 |
| H | 0.17278000  | 0.61794100  | -4.39782300 |
| H | -1.60500200 | 0.69379600  | -4.28737200 |
| H | -0.72471500 | -0.63530300 | -3.51508400 |
| C | -0.49076000 | 2.77224400  | -2.77394200 |
| H | 0.36163200  | 2.97230300  | -3.41765800 |
| H | -0.36990900 | 3.33659400  | -1.84479600 |
| H | -1.41440500 | 3.09974800  | -3.25521900 |
| O | -0.11401200 | -1.60857900 | -0.28057500 |

**Fe<sup>V</sup>(O) (S = 3/2) (B3LYP)**

|    |             |            |             |
|----|-------------|------------|-------------|
| Fe | 0.08621500  | 0.20425900 | 0.01281100  |
| O  | 0.00310800  | 0.08648000 | 4.00150300  |
| O  | 4.02303600  | 0.19883000 | 0.68083900  |
| O  | 2.09620300  | 1.26813400 | -3.26693000 |
| O  | -2.95750900 | 1.74076000 | -2.06134400 |
| N  | -0.62156300 | 0.18517500 | 1.77531700  |
| N  | 1.74253400  | 0.41932600 | 0.85806200  |
| N  | 0.55572500  | 1.08560400 | -1.57031000 |
| N  | -1.67929100 | 0.77728200 | -0.38988800 |
| C  | -2.01719400 | 0.30638800 | 1.88122000  |
| C  | 0.27787700  | 0.12482000 | 2.80245100  |
| C  | 1.74694600  | 0.10164500 | 2.30988900  |
| C  | 2.91290000  | 0.35156800 | 0.15775700  |
| C  | 1.80791200  | 0.96660100 | -2.10278000 |

|   |             |             |             |
|---|-------------|-------------|-------------|
| C | -0.58658700 | 1.39925200  | -2.46824600 |
| C | -1.88305500 | 1.33141600  | -1.62251200 |
| C | -2.62185300 | 0.64516100  | 0.64334600  |
| C | -4.00714900 | 0.82431100  | 0.56110600  |
| H | -4.44807700 | 1.09645700  | -0.38853000 |
| C | -4.78039700 | 0.66194300  | 1.71464300  |
| H | -5.85792100 | 0.79923700  | 1.65532900  |
| C | -4.18493000 | 0.32822600  | 2.93370700  |
| H | -4.79888900 | 0.20567000  | 3.82335100  |
| C | -2.80159500 | 0.14872100  | 3.02913300  |
| H | -2.32060000 | -0.09555800 | 3.96682700  |
| C | 2.53053300  | 1.15490700  | 3.11226300  |
| H | 3.59294400  | 1.09559900  | 2.87259700  |
| H | 2.36929500  | 0.97885700  | 4.18005000  |
| H | 2.16796900  | 2.16048600  | 2.87008800  |
| C | 2.27605700  | -1.32581900 | 2.57546800  |
| H | 3.33544100  | -1.38655400 | 2.32082200  |
| H | 1.72020900  | -2.04334600 | 1.96186700  |
| H | 2.13044600  | -1.57554300 | 3.63161000  |
| C | 4.14659500  | 0.36210500  | -1.93303100 |
| H | 4.67682300  | 1.32098100  | -1.98959200 |
| H | 3.97038500  | 0.00695500  | -2.94696000 |
| H | 4.75514000  | -0.33889700 | -1.36564000 |
| C | -0.73635900 | 0.34185700  | -3.58502200 |
| H | 0.11625100  | 0.39035200  | -4.26446500 |
| H | -1.66433100 | 0.52627000  | -4.13631900 |
| H | -0.78135300 | -0.65804600 | -3.13961000 |
| C | -0.47118500 | 2.82093600  | -3.04479000 |
| H | 0.37379600  | 2.87917000  | -3.73203900 |
| H | -0.32105400 | 3.54491800  | -2.23572700 |
| H | -1.40255300 | 3.07076800  | -3.56179600 |
| O | 0.18746300  | -1.34253600 | -0.46279200 |
| N | 2.85267600  | 0.50282800  | -1.25612000 |

**Fe<sup>IV</sup>(O)<sub>2</sub>(S = 1) (B3LYP)**

|    |             |             |             |
|----|-------------|-------------|-------------|
| Fe | 0.05803100  | 0.20579800  | 0.02887600  |
| O  | 0.03488700  | -0.03150600 | 4.02844500  |
| O  | 4.05569200  | 0.24155400  | 0.71536900  |
| O  | 2.12593200  | 1.33352900  | -3.26474300 |
| O  | -2.97566900 | 1.66465100  | -2.14490000 |
| N  | -0.62080400 | 0.22337700  | 1.81049600  |
| N  | 1.75649400  | 0.39316800  | 0.85470900  |
| N  | 0.56200000  | 1.06756100  | -1.57904800 |
| N  | -1.69521700 | 0.82516600  | -0.39205700 |
| C  | -2.00500600 | 0.38609200  | 1.90627300  |
| C  | 0.27175200  | 0.06485200  | 2.81114300  |
| C  | 1.74192300  | -0.01530400 | 2.28096300  |
| C  | 2.93258300  | 0.43515000  | 0.19927300  |
| C  | 1.81157900  | 1.06429100  | -2.08490300 |
| C  | -0.58494100 | 1.29713400  | -2.48930200 |
| C  | -1.90127100 | 1.28753400  | -1.64440700 |
| C  | -2.61560900 | 0.72831300  | 0.65429200  |
| C  | -3.99818700 | 0.94949400  | 0.59539100  |
| H  | -4.43284800 | 1.22022300  | -0.35922700 |
| C  | -4.77435100 | 0.83054600  | 1.75647600  |
| H  | -5.84979100 | 1.00204800  | 1.70118500  |
| C  | -4.17998200 | 0.49730300  | 2.97534300  |
| H  | -4.78983800 | 0.40771300  | 3.87484300  |
| C  | -2.79808600 | 0.27673900  | 3.05647000  |
| H  | -2.31142900 | 0.03084800  | 3.99254300  |
| C  | 2.59514100  | 0.90577100  | 3.17450500  |
| H  | 3.65316300  | 0.78866600  | 2.93670700  |
| H  | 2.39975800  | 0.66544800  | 4.22492500  |
| H  | 2.31350000  | 1.95327400  | 3.00517300  |
| C  | 2.17525300  | -1.49240700 | 2.42335300  |
| H  | 3.22849900  | -1.59608500 | 2.14758600  |
| H  | 1.56411000  | -2.09630100 | 1.74377300  |
| H  | 2.02201300  | -1.83467500 | 3.45453500  |



|   |             |             |             |
|---|-------------|-------------|-------------|
| C | 4.19583700  | 0.79625300  | -1.87076500 |
| H | 4.40035000  | 1.79786100  | -2.26971100 |
| H | 4.21655200  | 0.10381200  | -2.71975400 |
| H | 4.94671700  | 0.52280900  | -1.13274000 |
| C | -0.70753300 | 0.13939400  | -3.50675300 |
| H | 0.15309800  | 0.15131800  | -4.18160600 |
| H | -1.63701600 | 0.23555200  | -4.08207000 |
| H | -0.71734200 | -0.80606100 | -2.95357100 |
| C | -0.51119100 | 2.66005000  | -3.20402700 |
| H | 0.33032500  | 2.67362700  | -3.89812900 |
| H | -0.36814700 | 3.46031500  | -2.46627000 |
| H | -1.45573200 | 2.84287400  | -3.72733500 |
| O | -0.00167500 | -1.36391500 | -0.37035700 |
| N | 2.89750900  | 0.75410500  | -1.20335300 |

**Fe<sup>IV</sup>(O)<sub>2</sub>(S = 2) (B3LYP)**

|    |             |             |             |
|----|-------------|-------------|-------------|
| Fe | 0.05413700  | -0.19599800 | -0.10599900 |
| O  | 0.00447700  | -0.02011900 | 3.97960400  |
| O  | 4.05869600  | 0.37820200  | 0.68652300  |
| O  | 2.16308400  | 1.23357700  | -3.30857500 |
| O  | -2.91040100 | 1.85480000  | -2.06360200 |
| N  | -0.64540600 | -0.16633100 | 1.75257100  |
| N  | 1.74994500  | 0.19988600  | 0.80393600  |
| N  | 0.57529300  | 0.83713400  | -1.67199300 |
| N  | -1.65141100 | 0.94126900  | -0.32731700 |
| C  | -2.01583300 | 0.11690100  | 1.85553700  |
| C  | 0.24869800  | -0.05800700 | 2.76083500  |
| C  | 1.73292400  | 0.06435000  | 2.27377300  |
| C  | 2.92515100  | 0.35299200  | 0.15996500  |
| C  | 1.82623600  | 0.87189200  | -2.16134200 |
| C  | -0.56726700 | 1.33285400  | -2.46998500 |
| C  | -1.85811800 | 1.40226500  | -1.56961300 |

|   |             |             |             |
|---|-------------|-------------|-------------|
| C | -2.57547000 | 0.73253700  | 0.68188400  |
| C | -3.94044500 | 1.06705400  | 0.67128300  |
| H | -4.34134600 | 1.52782400  | -0.22396900 |
| C | -4.73543500 | 0.81697300  | 1.79588900  |
| H | -5.79254900 | 1.08538200  | 1.77425100  |
| C | -4.18541900 | 0.23592500  | 2.94069300  |
| H | -4.80753100 | 0.05350600  | 3.81737300  |
| C | -2.82850400 | -0.11481200 | 2.97056400  |
| H | -2.37573400 | -0.54525600 | 3.85587500  |
| C | 2.32209700  | 1.30954300  | 2.97099000  |
| H | 3.38272400  | 1.40132700  | 2.72735800  |
| H | 2.17713800  | 1.22942900  | 4.05294800  |
| H | 1.80150300  | 2.20881800  | 2.61949400  |
| C | 2.47443400  | -1.21095200 | 2.73369400  |
| H | 3.53566700  | -1.13500400 | 2.48426900  |
| H | 2.05359100  | -2.08684000 | 2.22411400  |
| H | 2.34455600  | -1.34345100 | 3.81448500  |
| C | 4.20472900  | 0.40479600  | -1.89782200 |
| H | 4.74020200  | 1.36293200  | -1.81834900 |
| H | 4.07277700  | 0.17423100  | -2.95409300 |
| H | 4.80949300  | -0.35274800 | -1.39654600 |
| C | -0.87186600 | 0.35787300  | -3.62714800 |
| H | -0.03197400 | 0.34861600  | -4.32920000 |
| H | -1.79151800 | 0.65677000  | -4.14352500 |
| H | -1.00263500 | -0.64557900 | -3.20758900 |
| C | -0.32881200 | 2.76377100  | -2.99458000 |
| H | 0.47747000  | 2.77364000  | -3.72981600 |
| H | -0.05071400 | 3.42298500  | -2.16217200 |
| H | -1.26129500 | 3.13601600  | -3.43148800 |
| O | -0.53951900 | -1.58321000 | -0.73036400 |
| N | 2.88520900  | 0.45019400  | -1.27520700 |
